# Supplementary material
Source: PubMed Central journal article supplement (PMC3307270)
Supplement: supp_M111.309138_jbc.M111.309138-1.pdf [file supp_M111.309138_jbc.M111.309138-1.pdf]

## Supplemental Information

### Cytosolic carboxypeptidase 1 is involved in processing of $\alpha$ -tubulin and $\beta$ -tubulin

Iryna Berezniuk<sup>1</sup>, Hang T. Vu<sup>2</sup>, Peter J. Lyons<sup>3</sup>, Juan J. Sironi<sup>3,4</sup>, Hui Xiao<sup>5</sup>, Berta Burd<sup>5</sup>, Mitsutoshi Setou<sup>2</sup>, Ruth H. Angeletti<sup>5</sup>, Koji Ikegami<sup>2</sup>, and Lloyd D. Fricker<sup>1,3</sup>

- 1) Department of Neuroscience, Albert Einstein College of Medicine, Bronx, NY 10461
- 2) Department of Cell Biology and Anatomy, Hamamatsu University School of Medicine, 1-20-1 Handayama, Hamamatsu 431-3192, Japan
- 3) Department of Molecular Pharmacology, Albert Einstein College of Medicine, Bronx, NY 10461
- 4) Department of Pathology, Albert Einstein College of Medicine, Bronx, NY 10461
- 5) Laboratory of Macromolecular Analysis and Proteomics, Albert Einstein College of Medicine, Bronx, NY 10461

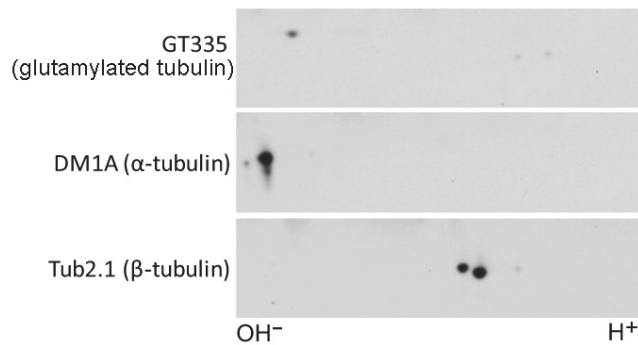

**Figure S1. Levels of polyE tubulins in HEK293T cells.** Cell lysates of HEK293T cells were subjected to high-resolution 2DE. There are almost no poly-glutamylated tubulins.

**Figure S2. Purification of recombinant CCP1.** Immunoblot analysis of fractions obtained during purification. Sf9 cells were infected with WT or His-tagged CCP1 recombinant baculovirus. Cell extracts (input, in) were loaded into the Talon column and non-bound fraction (flow-through, FT), wash (W), elute with 10 mM imidazole (1), elute with 20 mM imidazole (2), and elute with 80 mM imidazole (3) were collected. Aliquots of fractions (0.1% of in and FT, 1% of other fractions) were separated by SDS-PAGE and either probed with tetra-His antibody (upper panel), CCP1 antisera (middle panel) or stained with ponceau S solution (lower panel). The theoretical MW of CCP1 is 130 kDa.

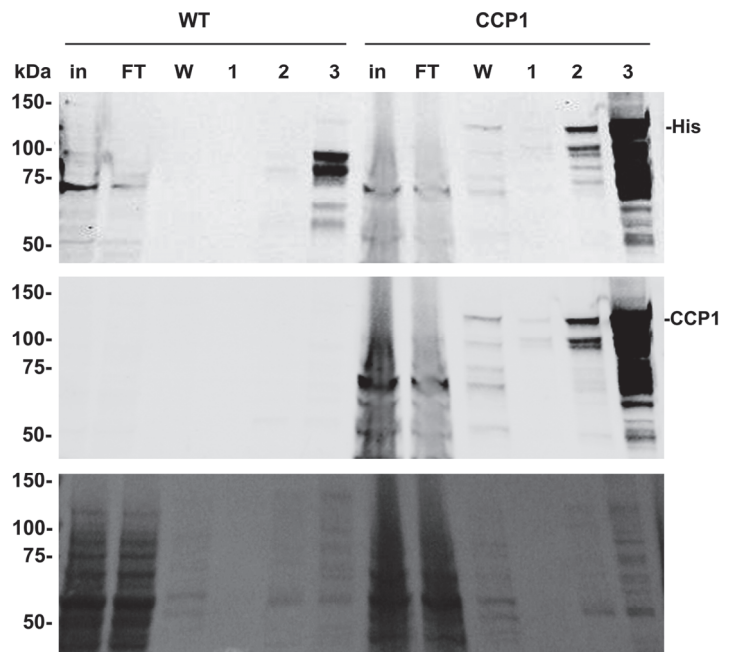

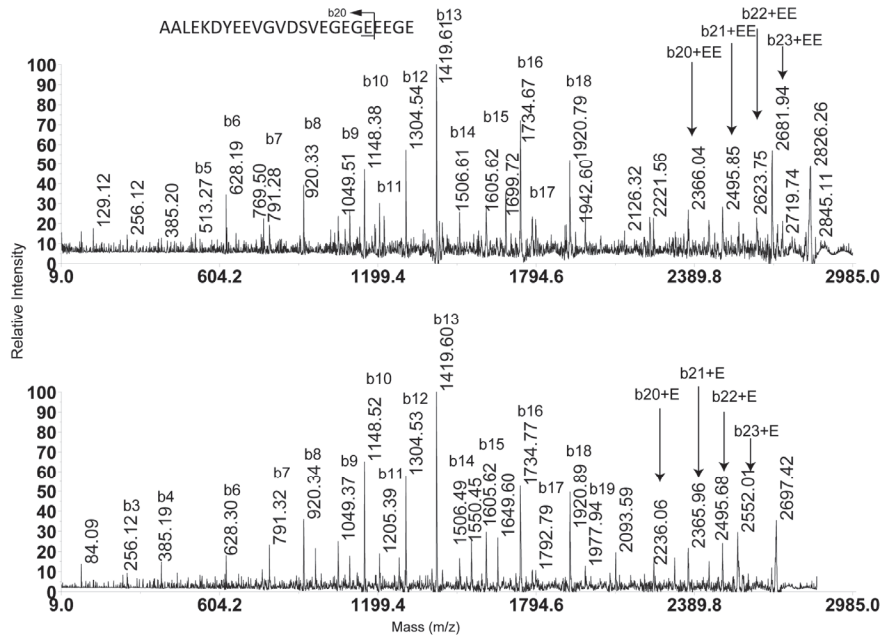

**Figure S3A. Fragmentation profiles of the C-terminal representative peptides from  $\alpha$ -tubulin.** (Top) Positive MALDI TOF-TOF MS/MS spectrum of the precursor 2696.2 of  $\alpha 1a/\alpha 1b/\alpha 3$ . (Bottom) Positive MALDI TOF-TOF MS/MS spectrum of the precursor 2825.3 of  $\alpha 1a/\alpha 1b/\alpha 3$ . Each of the sequence is shown in the figures. Mainly b ions are labelled in the mass spectra. The polyglutamylated site of both peptides is underlined.

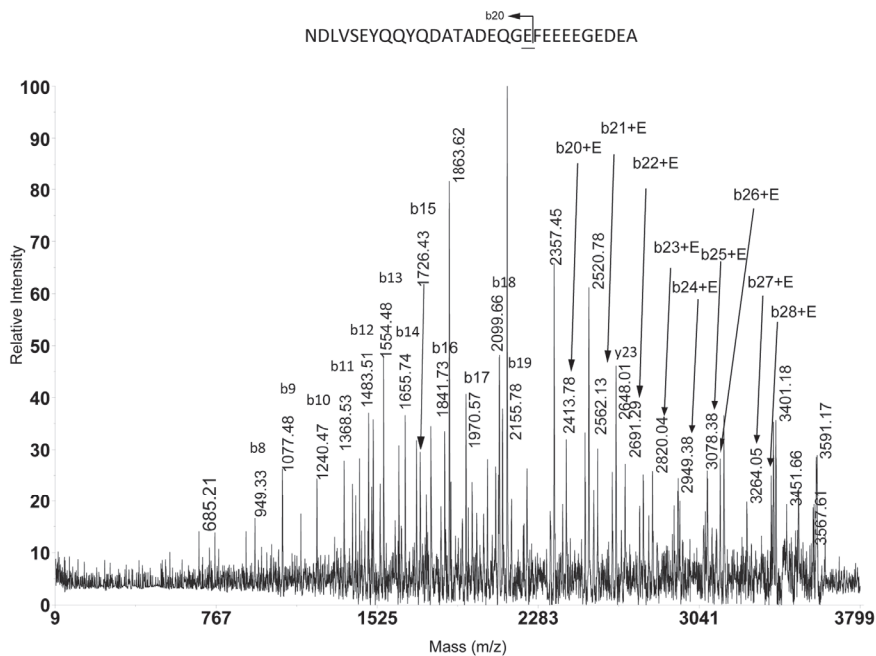

**Figure S3B. Fragmentation profiles of the C-terminal representative peptides from  $\beta$ -tubulin.** Positive MALDI TOF-TOF MS/MS spectrum of the precursor 3595.8 of  $\beta 2b$ . Each of the sequence is shown in the figures. Mainly b ions are labelled in the mass spectra. The polyglutamylated site of both peptides is underlined.

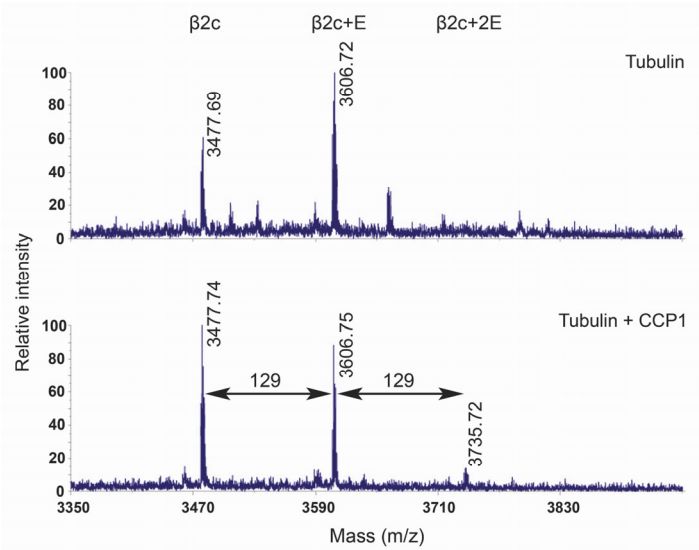

**Figure S4.  $\beta$ 2c tubulin isoform processing by purified CCP1.** Representative spectra of  $\beta$ 2c form of porcine  $\beta$ -tubulin. After incubation, tubulin was isolated on polyacrylamide gel, digested with CNBr, and analyzed as described. The form shown is the C-terminal region of  $\beta$ 2c. **Top panel:** spectrum of  $\beta$ 2c brain tubulin alone. **Bottom panel:** spectrum of  $\beta$ 2c brain tubulin after incubation with purified CCP1. 129 is the molecular weight of Glu residue in Da.

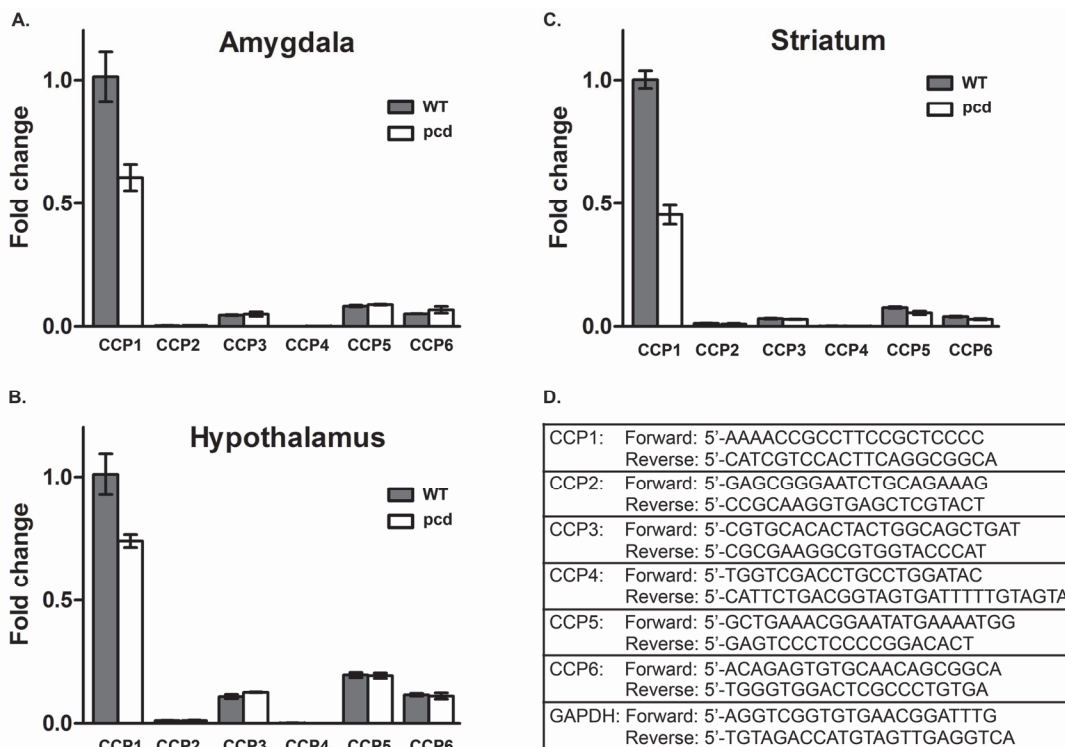

**Figure S5. Relative levels of CCP mRNAs in the brain of wild-type and *pcd* mice.** Quantitative real-time PCR was performed to determine mRNA levels of CCP1 through 6 in amygdala, hypothalamus, and striatum (panels A, B, and C, respectively) of adult wild-type and mutant mice. CCP1 mRNA is the most abundant among other CCP mRNAs in wild-type mice. The levels of CCP1 mRNA are lower in *pcd* mice, but the levels of other CCP transcripts are not affected by CCP1 mutation. **D:** Mouse primers used for quantitative real-time PCR. Fold change in expression was calculated using the DDCT method. GAPDH was used as an internal control. n = 4 (wild-type), n = 2 (*pcd*).

Table S1. Primers used for Quantitative real-time PCR of human cell lines.

|       |                                                                      |
|-------|----------------------------------------------------------------------|
| CCP1  | Forward: 5'-GCAGTGAAGCGTTTACCCT<br>Reverse: 5'-GCTGGGGCGATATGGCTC    |
| CCP2  | Forward: 5'-GGGAGGCAAACGAGGAAT<br>Reverse: 5'-CTGCCCATCATCCGTGT      |
| CCP3  | Forward: 5'-GCTAGGGAGATGGGTGCC<br>Reverse: 5'-AGGGGTTCCGTTTCTAAGCC   |
| CCP4  | Forward: 5'-GATATTCGGAGGCTCATCCA<br>Reverse: 5'-CTGCATACCGCTCACTTTGA |
| CCP5  | Forward: 5'-GAGCACAGCAGCCTTACT<br>Reverse: 5'-GCAACCCATTGTGACTTT     |
| CCP6  | Forward: 5'-TTCCTATTGCTACACCCT<br>Reverse: 5'-CACCTTTTCAACCACG       |
| GAPDH | Forward: 5'-GAAGGTGAAGGTCGGAGT<br>Reverse: 5'-GAAGATGGTGATGGGATTTC   |

**Movie S1. Athletic performance of *pcd/ΔTtll1* mouse.**

The *pcd/ΔTtll1* mouse was made to grasp a cord with the body on the downside of the cord. The mouse climbed onto the cord within a few seconds.

**Movie S2. Athletic performance of *pcd* mouse.**

The *pcd* mouse was made to grasp a cord with the body on the downside of the cord. The mouse failed to climb onto the cord within the allotted time of 1 minute.

**Movie S3. Comparison of athletic performance of *pcd* mouse with *pcd/ΔTtll1* and wild-type mice.**

The movie shows the severe ataxia of *pcd* mouse compared with *pcd/ΔTtll1* and wild-type mice.
